# Supplementary material for: A neutral self-assembled coordination cage organized for inclusion of aromatic guests
Source: Royal Society of Chemistry journal article supplement (doi:10.1039/b412325e), 2004-01-01
Supplement: b412325e.doc [file b412325e.doc]

A neutral self-assembled coordination cage organized for inclusion of aromatic guests

Amir Mahmoudkhani, Adrien P. Côté, George K. H. Shimizu*

Department of Chemistry, University of Calgary

2500 University Drive NW, Calgary, Alberta. Fax: 1 403 289 9488; Tel: 1 403 220 5347; E-mail: gshimizu@ucalgary.ca

# Experimental:

*Synthesis of Ligand*: Reaction of 1,3,5-tripehnylbenzene (**I**) with chlorosulfonic acid in CH2Cl2 afforded the tris(sulfonylchloride) derivative which upon hydrolysis and treatment with NaHCO3 can be isolated as the sodium salt. In a nominal experiment, 1 g (3.26 mmol) of **I** was dissolved in 100 ml dry CH2Cl2 in a 250 ml flask under the atmosphere of dry nitrogen gas. ClSO3H (2 mL, 29.3 mmol) was added drop wise to the above solution while stirring. Then, the mixture was brought to refluxing for a period of 1.5 hrs. It was left stirring for additional 8 hrs. The product was hydrolyzed using 10 ml water. White precipitate was formed immediately which was separated by filtration. It was dried in an oven operating at 80 C and kept in a desicator. Yield 80-90%. 1H NMR (200.13 MHz, D2O): 7.81, 7.85, 7.88, 7.93 ppm. 13C NMR (50.33 MHz, D2O): 123.64, 125.29, 126.10, 126.46, 138.58, 140.77, 141.33 ppm. Treatment with NaHCO3(aq.), provided the sodium salt. IR (KBr, cm-1): 3446s,br, 3010w, 1635m, 1596m, 1567w, 1498w, 1385m, 1186s,br, 1129s, 1040s, 1009s, 824s, 711s, 621s, 573m, 447w.

*Synthesis of Cu(II) Complex*: Cu(NO3)2,2.5H2O (0.11 g, 0.487 mmol) and the sodium salt of 1,3,5-tris(4-phenylsulfonato)benzene (0.20 g, 0.325 mmol) were dissolved in water (3mL), separately. After mixing, the light blue solution was heated gently to about 60 C, when solvent evaporated to half. The remaining solution was kept in a closed container over pyridine. Solution turns to dark blue by diffusion of pyridine and in a period of 4-7 days, dark blue cube-like crystals were formed, Yield 50-60%. Crystals are practically insoluble in most of polar and non-polar organic solvents. Upon standing overnight in a close container, crystals decay as apparently they crack. This occurs within few hours upon standing in air. Elemental analysis: Theoretical; C, 58.8; H, 4.1; N, 7.9, Found; C, 58.36; H, 4.17; N, 8.32. Material is found to be hygroscopic, as fine powder adsorbs water being reflected in the IR spectrum. IR (KBr pellet, cm-1): 3115w, 3096w, 3070w, 3047w, 3031w, 3006w, 1607s, 1491w, 1449s, 1382w, 1235s, 1223m,sh, 1180s, 1153m, 1124m, 1074m, 1033s, 1004s, 849w, 832w, 762m, 705vs, 697s,sh, 642w, 612s, 571w, 550w, 453w. Far-IR (CsI, cm-1): 436w, 389w.

## TG/DTA Analysis

**
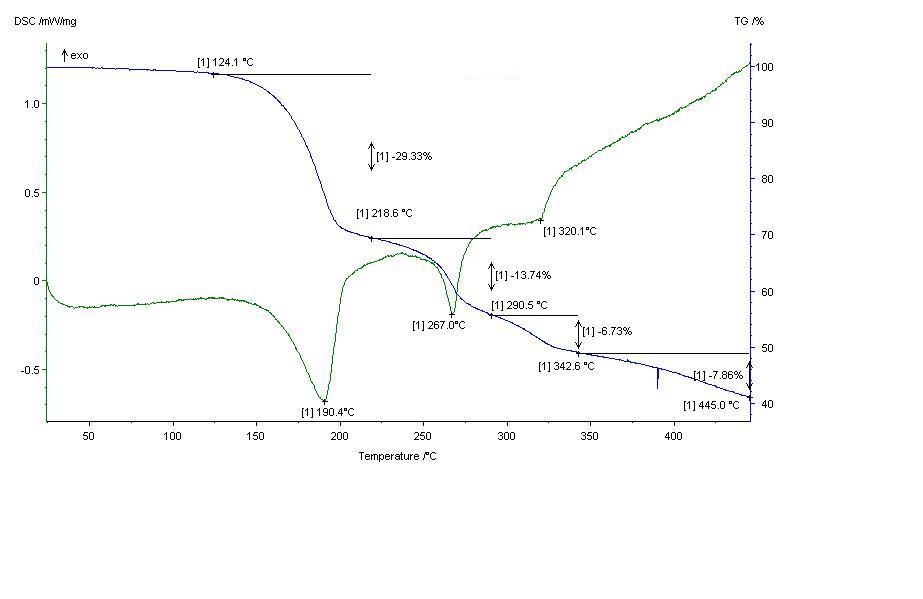
**

According to the thermal analysis, there is a major change starting from 120 C with a peak at 190 C corresponding to 29.33% weight lost. This is followed by another 13.75% lost at about 267 C. The above changes (with the sum of 43%) can be related to the lost of 13 pyridine molecules (theoretical value of 44.6%). It also indicates that we cannot remove selectively the guest pyridine molecule without decomposing the assembly. Indeed, a closer look at the structure reveals the single non-coordinated pyridine is trapped inside the cage and there is no way to move it out, adding Van der Waals radii to coordinated pyridines leaves no space to get out from internal void. Now, first weight lost corresponds to 8-9 pyridines and second one to 4-5. I believe assembly collapses upon removing any pyridines and thus it is unlikely to retain single crystal after removing any pyridine molecules at any stage mentioned above.

### X-ray Crystallography

A dark blue cube-like crystal (0.20 x 0.22 x .20 mm) was mounted using perfluoropolyether oil in a Hampton cryoloop. Data were collected using a Nonius Kappa CCD equipped with an Oxford Cryostream at 173 K. A Gaussian type of absorption correction was made on the original dataset. The structure was solved using direct methods.
